# Supplementary material for: A Novel Betulinic Acid Analogue: Synthesis, Solubility, Antitumor Activity and Pharmacokinetic Study in Rats
Source: MDPI journal article supplement (doi:10.3390/molecules28155715), 2023-07-28
Supplement: s1 [file s1]

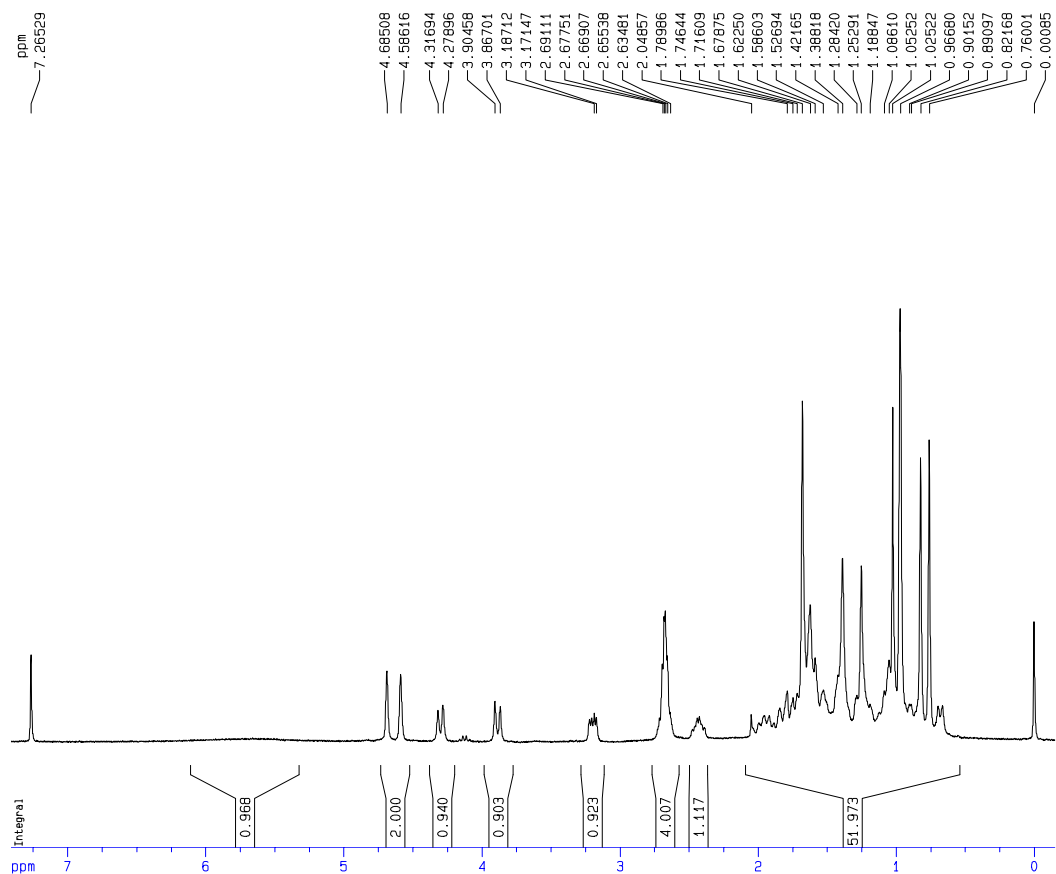

**Supplementary Figure S1.** <sup>1</sup>H NMR spectra of SBE

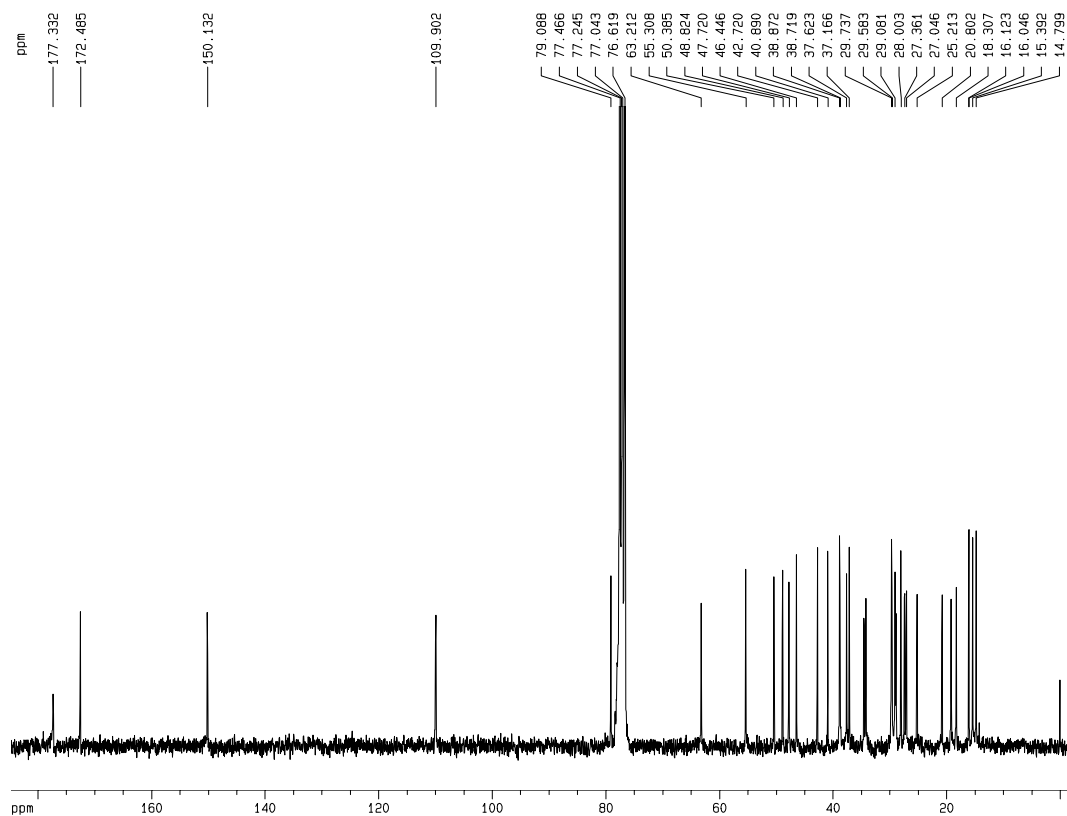

**Supplementary Figure S2.** <sup>13</sup>C NMR spectra of SBE

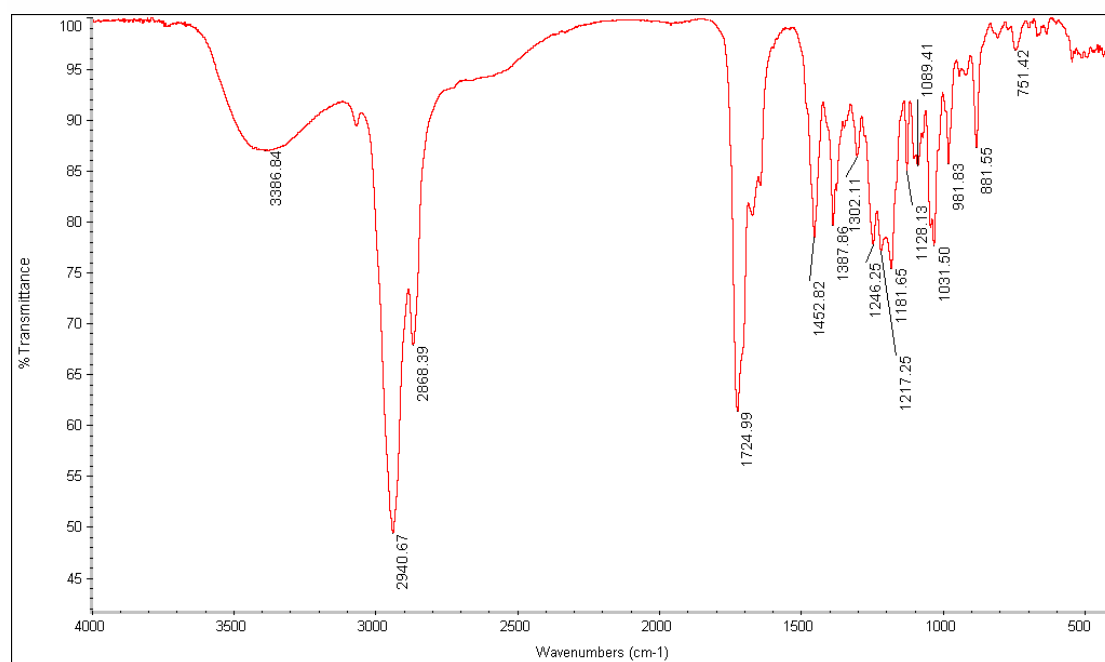

**Supplementary Figure S3.** IR spectra of SBE

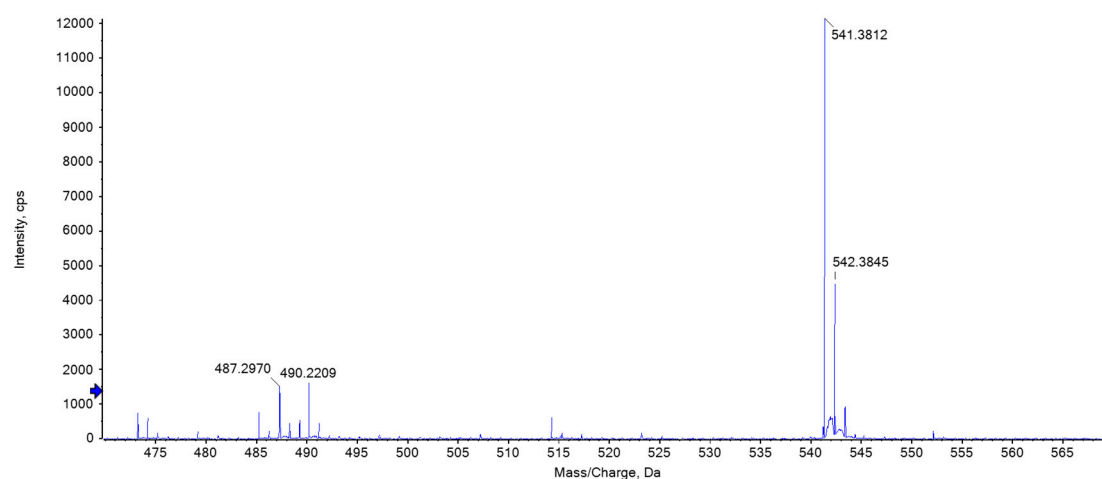

**Supplementary Figure S4.** HRMS spectra of SBE

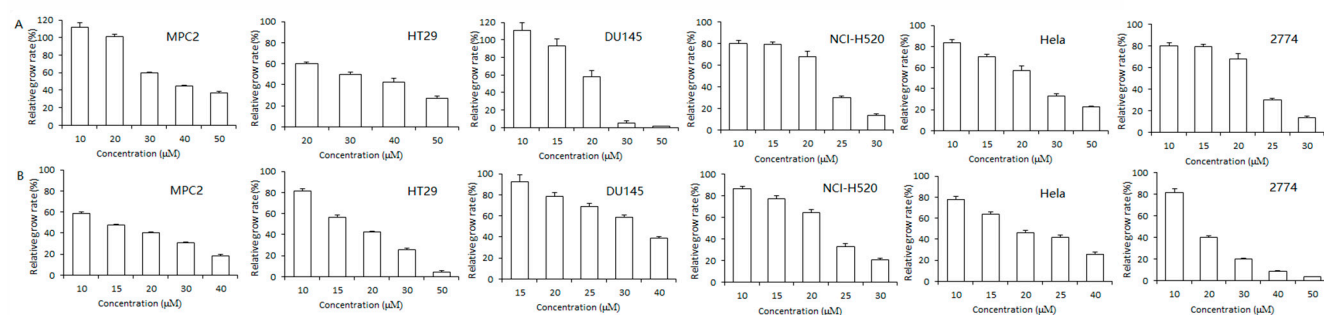

**Supplementary Figure S5.** Relative growth rate of different cancer cells incubated with different concentration of BA (A) and SBE (B).

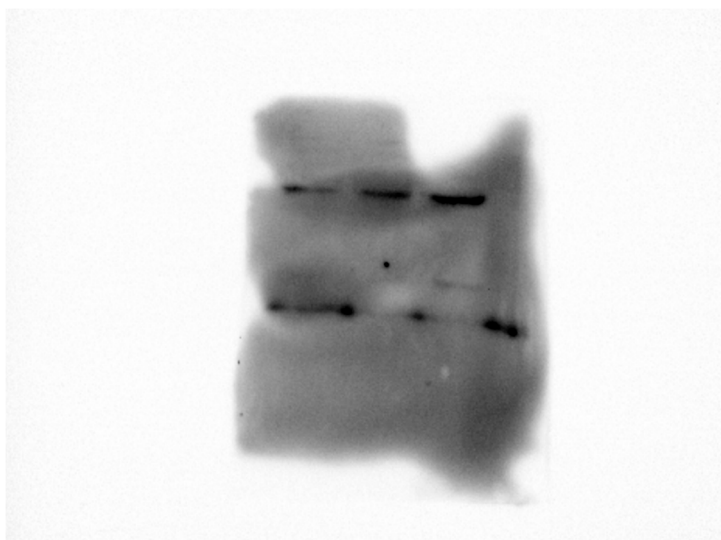

**Supplementary Figure S6.** Expression level of Bad (The upper ones).

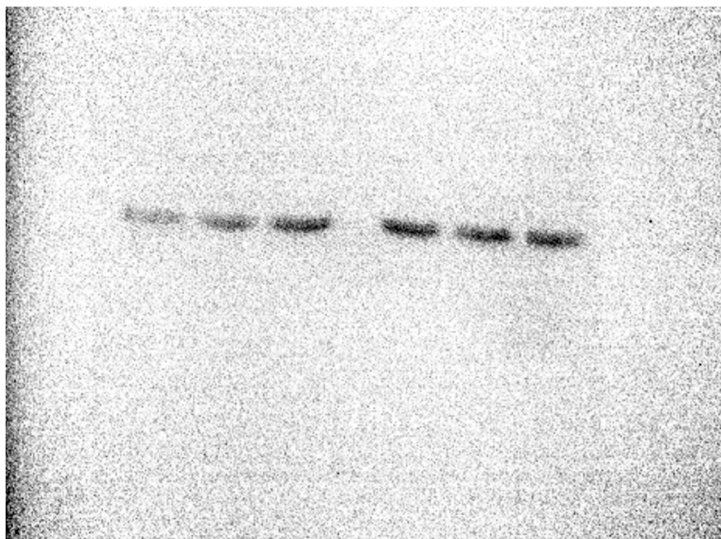

**Supplementary Figure S7.** Expression level of Bcl-xL.

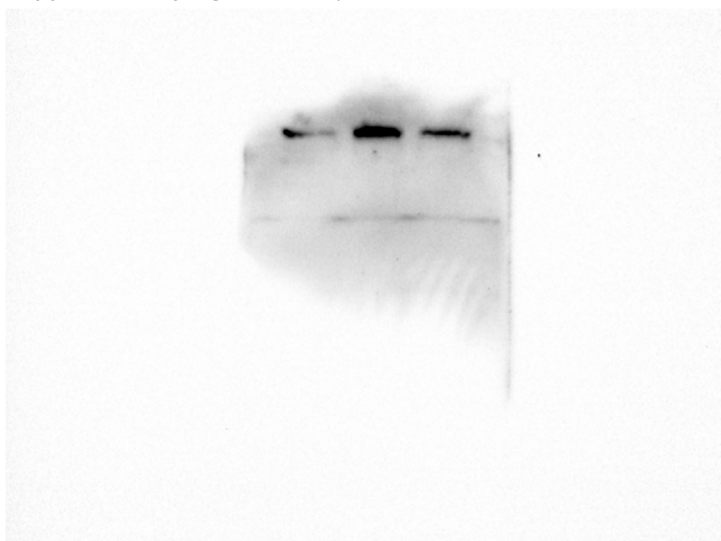

**Supplementary Figure S8.** Expression level of Cleaved-Cas9.
